# Supplementary material for: Automatic structure-based NMR methyl resonance assignment in large proteins
Source: bioRxiv or medRxiv preprint supplement (doi:10.1101/538272), 2019-04-04
Supplement: Supplementary file [file media-1.pdf]

## Supporting information

# Automatic structure-based methyl NMR resonance assignment in large proteins

Iva Pritišanac,<sup>1</sup> Julia M. Würz,<sup>1</sup> T. Reid Alderson,<sup>2</sup> and Peter Güntert<sup>\*,1,3,4</sup>

<sup>1</sup>Institute of Biophysical Chemistry, Center for Biomolecular Magnetic Resonance, Goethe University Frankfurt am Main, 60438 Frankfurt am Main, Germany

<sup>2</sup>Laboratory of Chemical Physics, NIDDK, National Institutes of Health, Bethesda, Maryland 20892-0520, United States

<sup>3</sup>Laboratory of Physical Chemistry, ETH Zürich, 8093 Zürich, Switzerland

<sup>4</sup>Graduate School of Science, Tokyo Metropolitan University, Hachioji, Tokyo 192-0397, Japan

\*Correspondence to: [guntert@em.uni-frankfurt.de](mailto:guntert@em.uni-frankfurt.de)

## Contents

**Figure S1.** Parametrization of the distance cutoff  $d_{\text{cut}}$  and the probability of expected methyl-methyl NOE contacts,  $p_{\text{NOE}}$ .

**Figure S2.** Accuracy of the methyl assignments obtained for the different values of NOE probabilities over a range of NOE distance cutoffs,  $d_{\text{cut}}$ .

**Figure S3.** Determination of the optimal number of individual assignment runs for automatic methyl resonance assignment with MethylFLYA

**Table S1.** Methyl resonance assignments by MethylFLYA, MAGMA, MAP-XSII, and FLAMEnGO2.0.

**Figure S4.** Sources of errors in the automatic methyl resonance assignments generated by MethylFLYA.

**Table S2.** Summary of errors in the automatic methyl resonance assignments generated with MethylFLYA

**Figure S5.** Parameter optimization for automatic NOESY peak picking with CYPICK.

**Figure S6.** 2D  $^{13}\text{C}(\omega_1)$ - $^{13}\text{C}(\omega_2)$  projections of 3D CCH NOESY (ATCase, HSP90) or 4D HCCH NOESY spectra (EIN).

**Table S3.** MethylFLYA computation times (h) for different combinations of input NMR data, as in Figure 3.

**Table S4.** Results of the CYPICK application to the 3D CCH NOESY (ATCase, HSP90) and 4D HCCH NOESY (EIN) spectra.

**Figure S7.** Intersection of assignments generated with different automatic methyl assignment protocols.

**Figure S8.** MethylFLYA performance on different input structures for three enzymes in the benchmark.

## Supplementary Methods

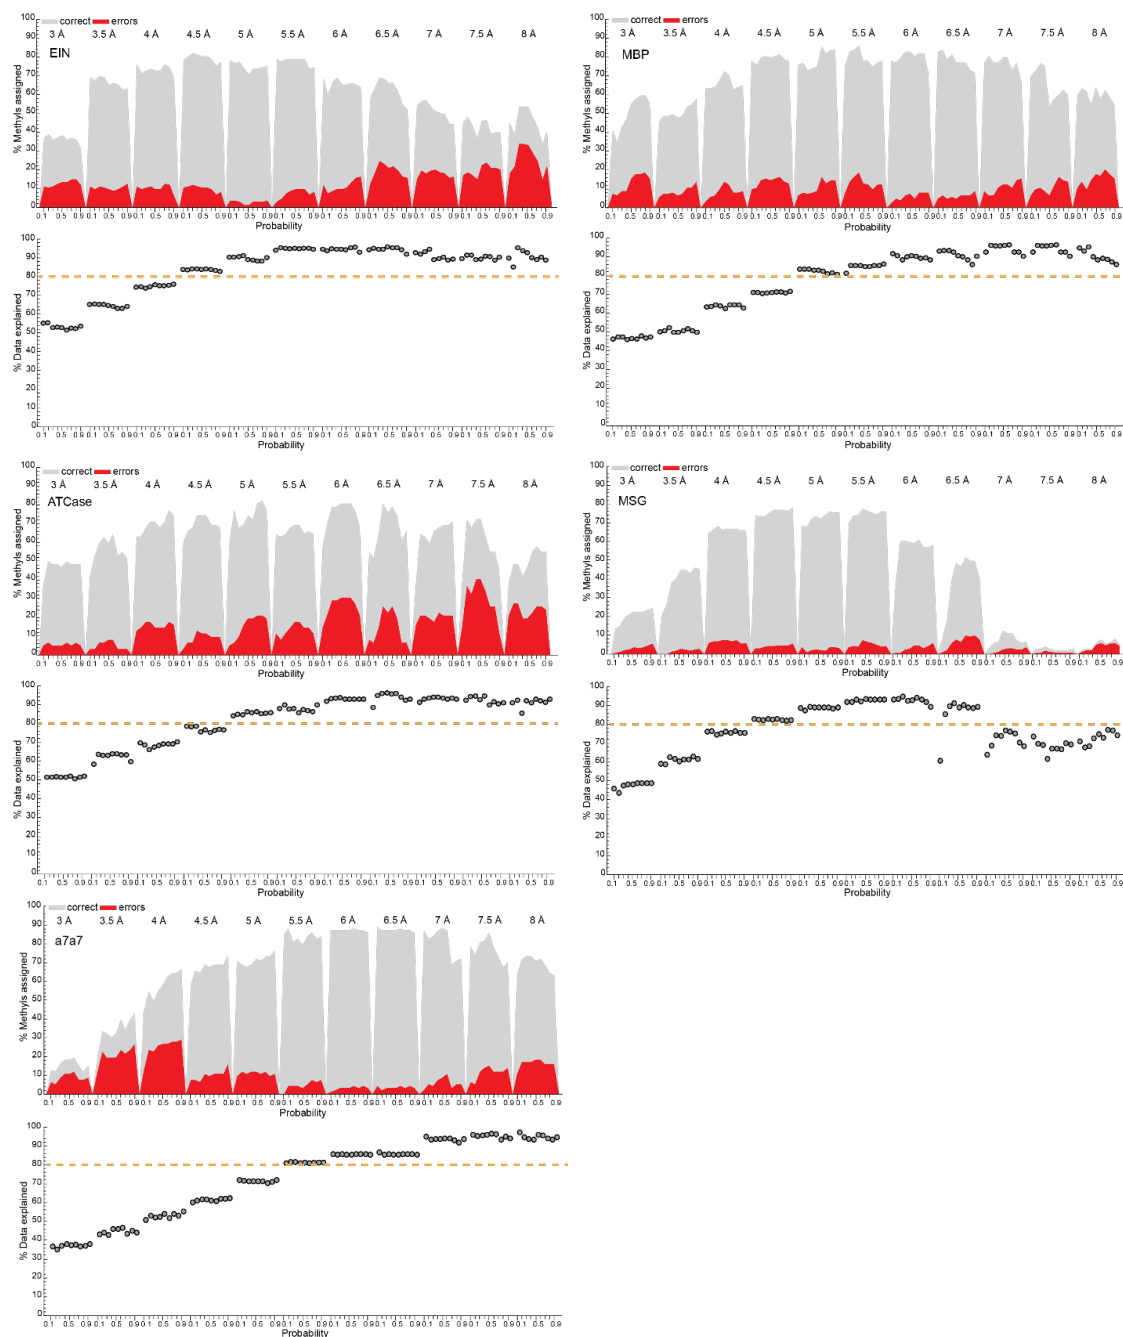

**Figure S1.** Parametrization of the distance cutoff  $d_{\text{cut}}$  and the probability of expected methyl-methyl NOE contacts,  $p_{\text{NOE}}$ . For each protein, the upper panel shows the percentage of correct (*grey*) and erroneous (*red*) strong (i.e. confident) assignments for given  $d_{\text{cut}}$  and  $p_{\text{NOE}}$  values. Assignment percentages are relative to the number of reference assignments. For each protein, the lower panels show for each protein the percentage of explained experimental NOESY peaks. The distances at which  $\sim 80\text{--}85\%$  of the data are explained generally led to the most reliable assignments. For the largest dataset (MSG) with  $>250$  methyls, the algorithmic performance significantly deteriorates for  $d_{\text{cut}} > 6.5 \text{ \AA}$  (equivalent to  $>11.5 \text{ \AA}$  C–C distance), resulting in an

unreliable assignment. Note that such large distance cutoffs are unrealistic in practice and unlikely to be generally required.

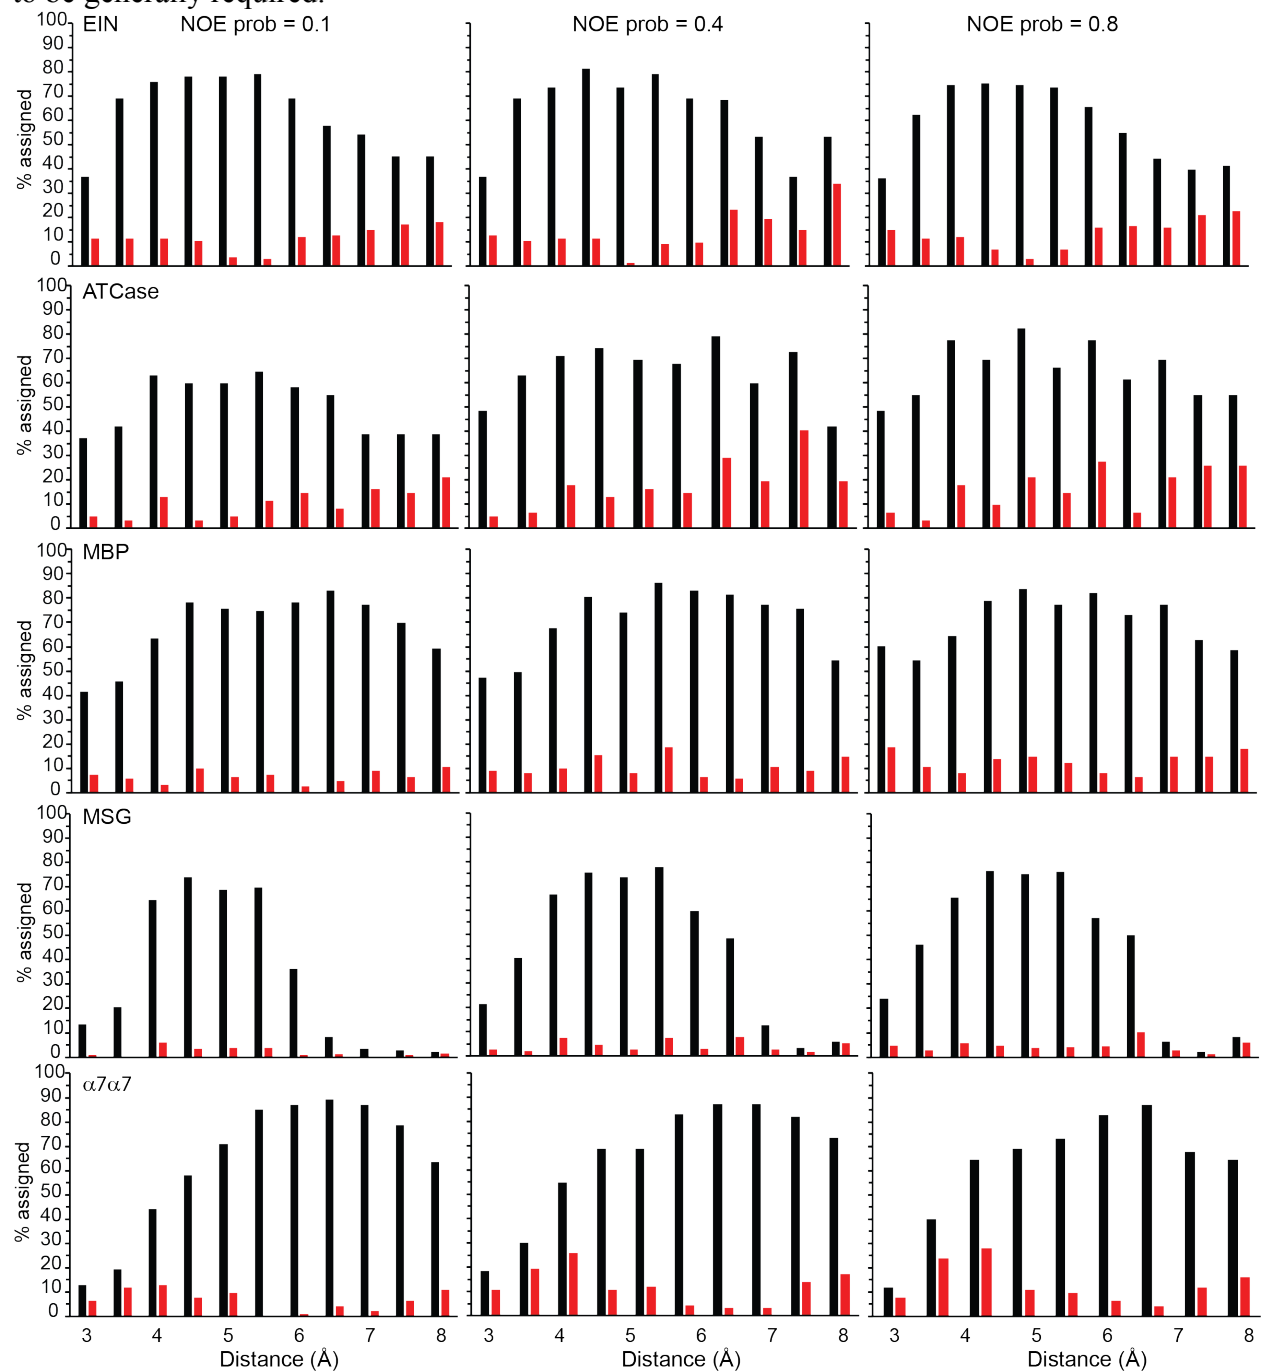

**Figure S2.** Accuracy of the methyl assignments obtained for the different values of NOE probability over a range of NOE distance cutoffs,  $d_{\text{cut}}$ . The percentage of accurately (*black*) and erroneously (*red*) assigned methyl groups is shown for the NOE probability values of 0.1, 0.4, and 0.8 in the first, second, and third column, respectively.

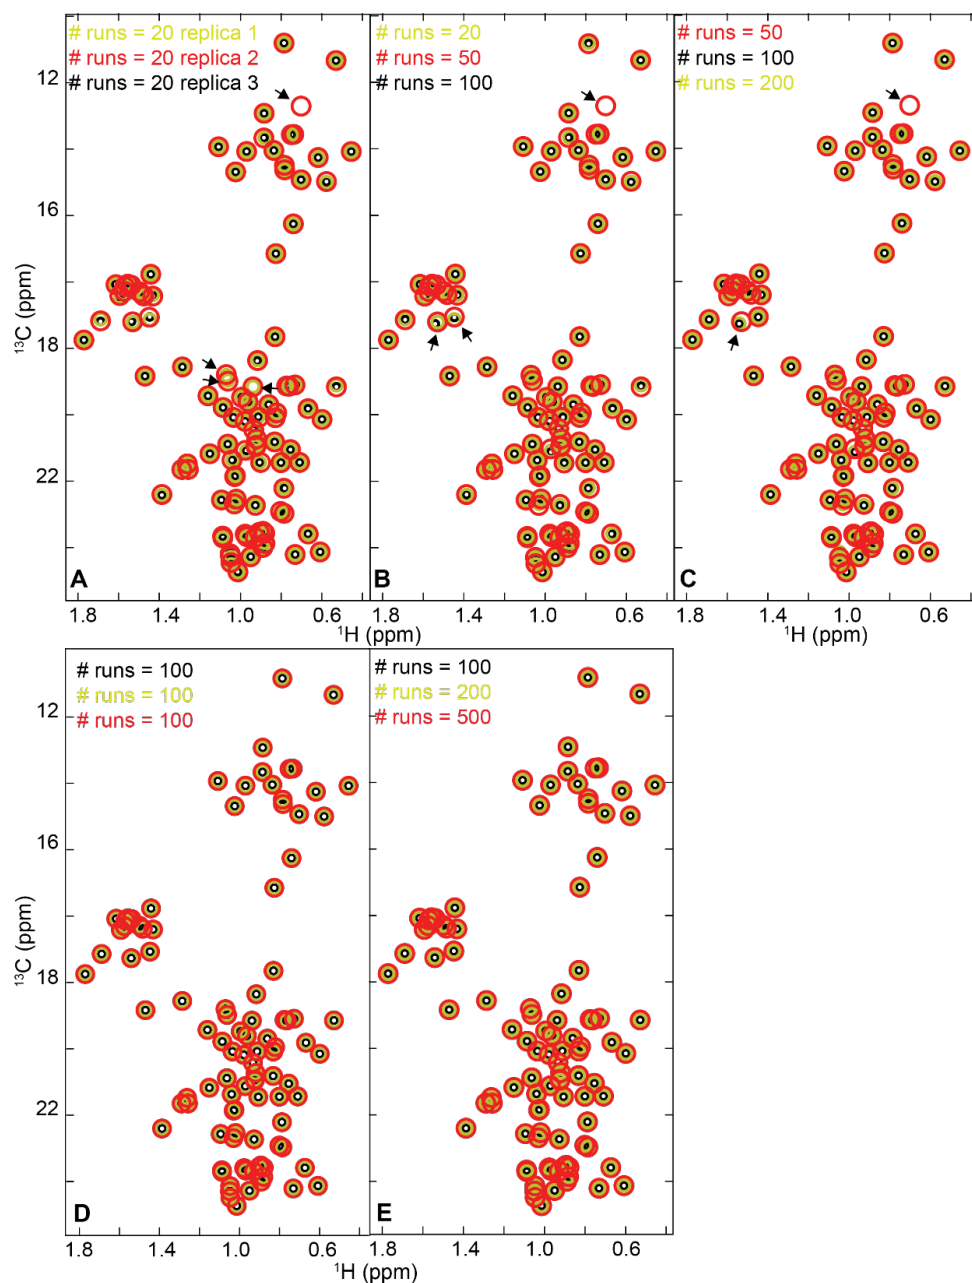

**Figure S3.** Determination of the optimal number of individual assignment runs for automatic methyl resonance assignment with MethylFLYA. Positions of the “strong” (i.e. confident) MethylFLYA-derived methyl assignments for EIN are shown in  $^1\text{H}$ - $^{13}\text{C}$  correlation plots as circles with different colors and increasing diameters. **(A)** Running 20 parallel assignment calculations in three replicates, each from a different random starting point, shows some differences in the derived strong assignments between the replicates (arrows). **(B-C)** Increasing the number of calculations to 50 shows that the differences persist when compared to the higher number of parallel calculations (100 or 200). **(D)** Running 100 parallel MethylFLYA calculations is sufficient for the reproducibility of strong assignments. **(E)** A further increase in the number of parallel calculations (e.g. 200, 500) results in sets of strong assignments that are consistent with the set of 100 parallel calculations.

**Table S1.** Methyl resonance assignments by MethylFLYA, MAGMA, MAP-XSII, and FLAMEnGO2.0. The methyl groups with reference assignment are listed, with the  $^{13}\text{C}$  and  $^1\text{H}$  chemical shift values in ppm in columns ‘13C’ and ‘1H’. Agreement or disagreement of the confident assignments by the four algorithms with the reference assignment is indicated by ‘=’ (agreement) or ‘!’ (disagreement) signs. The first sign is for  $^{13}\text{C}$ , the second for  $^1\text{H}$ . Missing, non-confident, or ambiguous assignments are left blank, except in the case of MethylFLYA, where also the weak (non-confident) assignments are indicated in parentheses. Filtered peak lists were used.

| ATCase |         |        |       |      |       |       |          |     |         |        |       |      |       |       |          |
|--------|---------|--------|-------|------|-------|-------|----------|-----|---------|--------|-------|------|-------|-------|----------|
|        | Methyl  | 13C    | 1H    | FLYA | MAGMA | MAPXS | FLAMENGO |     | Methyl  | 13C    | 1H    | FLYA | MAGMA | MAPXS | FLAMENGO |
| 7      | LEU CD1 | 24.700 | 0.825 | ==   |       |       |          | 74  | LEU CD1 | 25.859 | 0.789 | (==) |       | !!    | !!       |
| 7      | LEU CD2 | 23.351 | 0.779 | ==   |       |       |          | 76  | LEU CD1 | 25.036 | 0.788 | ==   |       |       |          |
| 9      | VAL CG1 | 20.219 | 0.870 | ==   |       |       |          | 76  | LEU CD2 | 24.234 | 0.659 | ==   |       |       |          |
| 9      | VAL CG2 | 21.153 | 0.879 | ==   |       |       |          | 83  | VAL CG1 | 21.482 | 0.783 | ==   |       |       |          |
| 12     | ILE CD1 | 13.256 | 0.486 | (==) |       | !!    | ==       | 83  | VAL CG2 | 21.844 | 0.779 | ==   |       |       |          |
| 17     | VAL CG1 | 20.691 | 0.894 | (==) |       |       |          | 86  | ILE CD1 | 11.600 | 0.602 | (==) |       |       | ==       |
| 18     | ILE CD1 | 13.418 | 0.734 | ==   |       | ==    |          | 91  | VAL CG1 | 21.777 | 0.944 | ==   |       | ==    |          |
| 21     | ILE CD1 | 14.203 | 0.678 | (==) |       | ==    |          | 91  | VAL CG2 | 21.184 | 0.954 | ==   |       | ==    |          |
| 30     | LEU CD1 | 25.344 | 0.851 | ==   | ==    |       |          | 92  | VAL CG1 | 21.705 | 1.032 | ==   |       |       |          |
| 30     | LEU CD2 | 23.065 | 0.650 | ==   | ==    |       |          | 92  | VAL CG2 | 18.600 | 0.761 | ==   |       | ==    |          |
| 32     | LEU CD1 | 23.190 | 0.364 | ==   |       |       | ==       | 99  | LEU CD1 | 25.443 | 0.739 | (==) | ==    | ==    |          |
| 32     | LEU CD2 | 24.650 | 0.286 | ==   |       |       | ==       | 99  | LEU CD2 | 24.463 | 0.751 | (==) | ==    | ==    |          |
| 35     | LEU CD1 | 24.537 | 0.727 | ==   | ==    |       |          | 103 | ILE CD1 | 13.711 | 0.794 | ==   | ==    | ==    | ==       |
| 35     | LEU CD2 | 21.752 | 0.733 | ==   | ==    |       |          | 106 | VAL CG2 | 19.857 | 0.939 | ==   |       | ==    |          |
| 42     | ILE CD1 | 14.481 | 0.676 | !!   | ==    | ==    |          | 107 | LEU CD1 | 25.746 | 0.448 | ==   |       |       |          |
| 44     | ILE CD1 | 16.259 | 0.769 | !!   | ==    | ==    |          | 107 | LEU CD2 | 21.905 | 0.533 | ==   |       |       |          |
| 46     | LEU CD2 | 22.309 | 0.823 | ==   | ==    |       | !!       | 127 | VAL CG1 | 21.790 | 0.696 | ==   |       | ==    | !!       |
| 48     | LEU CD1 | 22.510 | 0.844 | (!!) |       |       |          | 127 | VAL CG2 | 20.699 | 0.620 | ==   |       | ==    | ==       |
| 48     | LEU CD2 | 27.064 | 0.917 | (!!) |       |       |          | 134 | ILE CD1 | 13.073 | 0.492 | ==   | ==    | ==    | ==       |
| 58     | LEU CD1 | 24.286 | 0.781 | (==) |       | ==    |          | 136 | LEU CD1 | 25.551 | 0.682 | (==) |       | ==    |          |
| 58     | LEU CD2 | 26.475 | 0.732 | (==) |       |       |          | 136 | LEU CD2 | 25.695 | 0.588 | (==) |       | ==    |          |
| 59     | ILE CD1 | 14.045 | 0.754 | =!   |       | ==    |          | 149 | VAL CG1 | 21.889 | 1.161 | ==   |       |       |          |
| 61     | ILE CD1 | 14.380 | 0.679 | =!   |       | ==    |          | 149 | VAL CG2 | 20.361 | 0.954 | ==   |       | ==    |          |
| 66     | LEU CD1 | 24.699 | 0.617 | (==) |       | !!    |          | 150 | VAL CG1 | 22.056 | 0.591 | ==   |       | ==    | !!       |
| 66     | LEU CD2 | 21.671 | 0.481 | (==) |       |       |          | 150 | VAL CG2 | 22.442 | 0.733 | ==   |       | ==    | ==       |
| 71     | VAL CG1 | 21.088 | 0.790 | ==   |       |       |          | 151 | LEU CD1 | 23.053 | 0.512 | ==   |       |       |          |
| 71     | VAL CG2 | 23.701 | 0.902 | ==   |       |       |          | 151 | LEU CD2 | 24.279 | 0.458 | ==   |       |       |          |

  

| EIN |         |        |       |      |       |       |          |     |         |        |       |      |       |       |          |
|-----|---------|--------|-------|------|-------|-------|----------|-----|---------|--------|-------|------|-------|-------|----------|
|     | Methyl  | 13C    | 1H    | FLYA | MAGMA | MAPXS | FLAMENGO |     | Methyl  | 13C    | 1H    | FLYA | MAGMA | MAPXS | FLAMENGO |
| 6   | LEU CD1 | 23.060 | 0.755 | ==   | ==    |       |          | 137 | LEU CD1 | 22.080 | 1.036 | ==   |       | ==    |          |
| 6   | LEU CD2 | 25.480 | 0.891 | ==   | ==    |       |          | 137 | LEU CD2 | 25.720 | 1.088 | ==   |       |       |          |
| 11  | ILE CD1 | 14.030 | 0.834 | ==   | ==    | ==    |          | 138 | LEU CD1 | 25.620 | 1.089 | ==   | ==    | ==    |          |
| 12  | ALA CB  | 23.660 | 1.258 | ==   | ==    | ==    |          | 138 | LEU CD2 | 24.580 | 1.095 | ==   | ==    | ==    |          |
| 16  | ALA CB  | 20.550 | 1.287 | ==   | ==    | ==    |          | 141 | ILE CD1 | 14.690 | 1.022 | ==   | ==    | ==    |          |
| 17  | LEU CD1 | 25.850 | 0.884 | ==   |       | !!    |          | 142 | LEU CD1 | 26.290 | 0.949 | ==   | ==    | ==    |          |
| 17  | LEU CD2 | 23.840 | 1.025 | ==   |       | !!    |          | 142 | LEU CD2 | 22.890 | 1.063 | ==   | ==    |       |          |
| 18  | LEU CD1 | 25.640 | 0.978 | ==   | ==    | !!    |          | 147 | ILE CD1 | 12.910 | 0.884 | (==) | ==    | ==    |          |
| 18  | LEU CD2 | 23.450 | 0.800 | ==   | ==    |       |          | 149 | LEU CD2 | 23.210 | 0.850 | ==   |       | !!    |          |
| 19  | LEU CD1 | 25.500 | 0.963 | (==) |       | !!    |          | 151 | ALA CB  | 19.030 | 1.427 | (==) | ==    | ==    |          |
| 19  | LEU CD2 | 23.980 | 0.890 | (==) |       | !!    |          | 152 | ILE CD1 | 13.680 | 0.883 | ==   | ==    | ==    |          |
| 24  | ILE CD1 | 14.070 | 0.970 | ==   | ==    | ==    |          | 156 | VAL CG1 | 22.100 | 0.832 | ==   |       | !!    |          |
| 26  | ILE CD1 | 11.330 | 0.531 | ==   | ==    | ==    |          | 156 | VAL CG2 | 17.160 | 0.826 | ==   |       | !!    |          |
| 31  | ILE CD1 | 14.940 | 0.697 | ==   | ==    | ==    |          | 157 | ILE CD1 | 14.070 | 0.457 | ==   | ==    | ==    |          |
| 33  | ALA CB  | 18.340 | 1.573 | ==   | ==    |       |          | 158 | LEU CD1 | 25.840 | 0.976 | ==   |       | ==    |          |
| 36  | VAL CG1 | 21.790 | 1.087 | ==   |       |       |          | 159 | VAL CG1 | 23.450 | 0.710 | ==   |       | ==    |          |
| 36  | VAL CG2 | 23.440 | 1.255 | ==   |       | ==    |          | 159 | VAL CG2 | 21.190 | 0.761 | ==   |       | ==    |          |
| 40  | VAL CG1 | 21.440 | 1.161 | ==   |       | ==    |          | 160 | ALA CB  | 24.410 | 1.387 | ==   | ==    | ==    |          |
| 40  | VAL CG2 | 23.690 | 1.294 | ==   |       | ==    |          | 161 | ALA CB  | 18.120 | 1.617 | ==   |       | ==    |          |
| 44  | LEU CD1 | 21.810 | 0.669 | ==   | ==    |       |          | 163 | LEU CD1 | 25.570 | 0.670 | (==) |       |       |          |
| 44  | LEU CD2 | 25.730 | 0.927 | ==   | ==    |       |          | 163 | LEU CD2 | 24.230 | 0.782 | (==) |       |       |          |
| 50  | ALA CB  | 18.380 | 1.482 | ==   |       |       |          | 169 | ALA CB  | 19.220 | 1.459 | (==) |       | !!    |          |
| 54  | LEU CD1 | 26.170 | 1.046 | ==   | ==    |       |          | 176 | VAL CG1 | 22.150 | 0.600 | ==   |       | !!    |          |
| 54  | LEU CD2 | 23.180 | 1.151 | (==) | ==    |       |          | 176 | VAL CG2 | 22.060 | 0.914 | ==   |       | !!    |          |
| 57  | ILE CD1 | 13.640 | 0.742 | (=)  |       | !!    |          | 177 | LEU CD1 | 26.030 | 0.889 | ==   | ==    | ==    |          |
| 61  | ALA CB  | 18.520 | 1.593 | (==) |       | !!    |          | 177 | LEU CD2 | 21.700 | 0.860 | ==   | ==    | ==    |          |
| 71  | ALA CB  | 18.220 | 1.530 | (!!) |       | ==    |          | 180 | ILE CD1 | 16.240 | 0.740 | ==   | ==    | ==    |          |
| 72  | ILE CD1 | 12.740 | 0.697 | ==   |       | ==    |          | 183 | ALA CB  | 20.740 | 1.604 | (!!) |       | ==    |          |
| 77  | ILE CD1 | 13.390 | 0.888 | (==) |       |       |          | 194 | ALA CB  | 18.450 | 1.470 | (==) |       |       |          |
| 79  | LEU CD1 | 23.460 | 0.903 | ==   |       |       |          | 197 | LEU CD1 | 26.601 | 1.011 | ==   |       |       |          |
| 79  | LEU CD2 | 25.500 | 0.916 | ==   |       |       |          | 199 | LEU CD1 | 26.133 | 0.840 | (=)  |       |       |          |
| 80  | LEU CD1 | 26.580 | 1.046 | ==   |       |       |          | 201 | ALA CB  | 22.220 | 1.031 | (!!) |       |       |          |
| 80  | LEU CD2 | 24.410 | 1.011 | ==   |       |       |          | 202 | ILE CD1 | 13.550 | 0.731 | ==   | ==    | ==    |          |

|     |     |     |        |       |      |    |     |     |     |        |       |      |    |
|-----|-----|-----|--------|-------|------|----|-----|-----|-----|--------|-------|------|----|
| 85  | LEU | CD1 | 24.750 | 1.031 | ==   | == | 203 | VAL | CG1 | 19.700 | 0.729 | (==) |    |
| 85  | LEU | CD2 | 24.730 | 0.927 | ==   | == | 208 | VAL | CG1 | 22.860 | 0.922 | ==   | == |
| 89  | ILE | CD1 | 14.270 | 0.619 | ==   | == | 208 | VAL | CG2 | 19.660 | 0.830 | ==   | == |
| 90  | ILE | CD1 | 13.940 | 1.107 | ==   | == | 212 | VAL | CG1 | 23.000 | 0.925 | ==   | == |
| 91  | ALA | CB  | 18.060 | 1.544 | ==   | == | 212 | VAL | CG2 | 22.820 | 0.836 | ==   | == |
| 92  | LEU | CD1 | 26.780 | 1.011 | ==   | == | 218 | LEU | CD1 | 26.130 | 0.609 | ==   | == |
| 92  | LEU | CD2 | 22.750 | 0.915 | ==   | == | 218 | LEU | CD2 | 24.900 | 0.806 | ==   | == |
| 93  | ILE | CD1 | 14.460 | 0.786 | ==   | == | 219 | ILE | CD1 | 14.980 | 0.580 | ==   | == |
| 100 | ALA | CB  | 19.750 | 1.771 | ==   | == | 220 | LEU | CD1 | 24.990 | 0.781 | ==   | == |
| 102 | ALA | CB  | 18.270 | 1.496 | ==   | == | 220 | LEU | CD2 | 26.220 | 0.731 | ==   | == |
| 103 | ALA | CB  | 20.840 | 1.470 | ==   | == | 222 | ALA | CB  | 18.140 | 1.568 | ==   | == |
| 104 | ALA | CB  | 17.780 | 1.442 | ==   | == | 223 | VAL | CG1 | 20.380 | 0.918 | (==) |    |
| 107 | VAL | CG1 | 21.610 | 0.961 | ==   | == | 223 | VAL | CG2 | 21.200 | 0.936 | (==) | == |
| 107 | VAL | CG2 | 23.870 | 1.031 | ==   | == | 227 | VAL | CG1 | 21.070 | 0.718 | ==   | == |
| 108 | ILE | CD1 | 10.820 | 0.787 | ==   | == | 227 | VAL | CG2 | 21.940 | 0.818 | ==   | == |
| 112 | ALA | CB  | 18.440 | 1.429 | ==   | == | 229 | VAL | CG1 | 21.470 | 0.996 | ==   | == |
| 114 | ALA | CB  | 18.000 | 1.540 | ==   | == | 229 | VAL | CG2 | 21.080 | 0.786 | ==   | == |
| 115 | LEU | CD1 | 25.590 | 0.866 | ==   | == | 235 | VAL | CG1 | 21.160 | 0.527 | ==   | == |
| 115 | LEU | CD2 | 23.090 | 0.976 | ==   | == | 236 | ILE | CD1 | 13.530 | 0.754 | ==   | == |
| 118 | LEU | CD2 | 22.450 | 0.945 | (!=) |    | 241 | ALA | CB  | 17.870 | 1.594 | (==) |    |
| 123 | LEU | CD1 | 26.150 | 1.062 | ==   |    | 242 | VAL | CG1 | 21.020 | 0.981 | (!=) | !! |
| 127 | ALA | CB  | 19.170 | 1.688 | ==   | == | 242 | VAL | CG2 | 22.040 | 1.167 | (!)  |    |
| 130 | VAL | CG1 | 22.207 | 0.976 | ==   | == | 246 | VAL | CG1 | 21.100 | 1.041 | (==) |    |
| 130 | VAL | CG2 | 23.390 | 1.038 | ==   | == | 246 | VAL | CG2 | 20.840 | 1.075 | (==) |    |
| 133 | ILE | CD1 | 14.630 | 0.784 | ==   | == | 247 | ALA | CB  | 19.240 | 1.534 | (==) |    |

MBP

|     | Methyl | 13C | 1H     | FLYA  | MAGMA | MAPXS | FLAMENGO |     | Methyl | 13C | 1H     | FLYA   | MAGMA | MAPXS | FLAMENGO |
|-----|--------|-----|--------|-------|-------|-------|----------|-----|--------|-----|--------|--------|-------|-------|----------|
| 2   | ILE    | CD1 | 13.054 | 0.402 | (!=)  | ==    | !!       | 183 | VAL    | CG1 | 22.416 | 0.882  | ==    |       | ==       |
| 7   | LEU    | CD1 | 25.203 | 0.267 | ==    | ==    | !!       | 183 | VAL    | CG2 | 22.420 | 0.841  | ==    |       | ==       |
| 7   | LEU    | CD2 | 24.064 | 0.615 | ==    | ==    | ==       | 192 | LEU    | CD1 | 24.249 | 1.085  | ==    | ==    | ==       |
| 8   | VAL    | CG1 | 20.962 | 0.876 | (!)   |       |          | 192 | LEU    | CD2 | 25.330 | 0.845  | ==    | ==    | !!       |
| 8   | VAL    | CG2 | 21.211 | 0.923 | (!=)  |       |          | 195 | LEU    | CD1 | 23.706 | 0.893  | ==    | ==    |          |
| 9   | ILE    | CD1 | 14.523 | 0.346 | ==    | ==    | !!       | 195 | LEU    | CD2 | 25.191 | 0.845  | ==    | ==    |          |
| 11  | ILE    | CD1 | 13.105 | 0.107 | ==    | ==    | !!       | 196 | VAL    | CG1 | 21.649 | 0.969  | ==    |       |          |
| 20  | LEU    | CD1 | 24.725 | 0.876 | ==    |       |          | 196 | VAL    | CG2 | 23.319 | 0.856  | ==    |       |          |
| 20  | LEU    | CD2 | 26.879 | 0.638 | ==    |       | !!       | 198 | LEU    | CD1 | 25.598 | 1.018  | (!!)  |       |          |
| 23  | VAL    | CG1 | 22.314 | 0.823 | ==    |       |          | 198 | LEU    | CD2 | 23.461 | 0.813  | (!!)  |       |          |
| 23  | VAL    | CG2 | 23.403 | 1.252 | ==    |       |          | 199 | ILE    | CD1 | 14.222 | 0.743  | ==    | ==    | ==       |
| 33  | ILE    | CD1 | 10.138 | 0.574 | ==    | ==    | ==       | 212 | ILE    | CD1 | 13.110 | 0.867  | (==)  |       | ==       |
| 35  | VAL    | CG1 | 20.685 | 0.331 | ==    |       |          | 226 | ILE    | CD1 | 11.775 | 0.060  | ==    |       | ==       |
| 35  | VAL    | CG2 | 22.360 | 0.760 | ==    |       |          | 240 | VAL    | CG1 | 20.890 | 0.585  | (!=)  |       |          |
| 37  | VAL    | CG1 | 22.840 | 0.951 | ==    |       |          | 240 | VAL    | CG2 | 21.830 | 0.788  | (!!)  |       | ==       |
| 37  | VAL    | CG2 | 20.673 | 0.766 | ==    |       |          | 244 | VAL    | CG1 | 22.083 | 1.072  | (!!)  |       |          |
| 43  | LEU    | CD1 | 26.677 | 1.101 | ==    | ==    |          | 244 | VAL    | CG2 | 21.606 | 0.636  | (!=)  |       |          |
| 43  | LEU    | CD2 | 26.431 | 1.133 | ==    | ==    | !!       | 246 | VAL    | CG1 | 20.441 | 0.969  | ==    |       |          |
| 50  | VAL    | CG1 | 21.260 | 0.967 | (!!)  |       |          | 246 | VAL    | CG2 | 21.596 | 0.983  | ==    | !!    |          |
| 50  | VAL    | CG2 | 19.894 | 0.906 | (!!)  |       |          | 247 | LEU    | CD1 | 25.833 | 0.663  | (!=)  |       | ==       |
| 59  | ILE    | CD1 | 13.790 | 0.735 | ==    | ==    |          | 247 | LEU    | CD2 | 23.824 | 0.645  | (!!)  |       |          |
| 60  | ILE    | CD1 | 14.568 | 0.452 | ==    | ==    | ==       | 259 | VAL    | CG1 | 21.509 | 0.925  | ==    |       | ==       |
| 75  | LEU    | CD1 | 25.725 | 0.638 | (=)   | ==    |          | 259 | VAL    | CG2 | 22.697 | 0.980  | ==    |       | ==       |
| 75  | LEU    | CD2 | 20.664 | 0.538 | (!!)  | ==    |          | 261 | VAL    | CG1 | 20.308 | 0.679  | ==    |       | ==       |
| 76  | LEU    | CD1 | 27.430 | 0.897 | ==    | ==    |          | 261 | VAL    | CG2 | 20.936 | 0.565  | ==    |       |          |
| 76  | LEU    | CD2 | 21.891 | 0.538 | ==    | ==    | ==       | 262 | LEU    | CD1 | 22.681 | 0.806  | ==    | ==    |          |
| 79  | ILE    | CD1 | 12.313 | 0.161 | ==    | ==    | ==       | 262 | LEU    | CD2 | 25.314 | 0.885  | ==    | ==    |          |
| 89  | LEU    | CD1 | 26.152 | 0.526 | ==    | ==    |          | 266 | ILE    | CD1 | 13.882 | 0.915  | ==    | ==    |          |
| 89  | LEU    | CD2 | 25.298 | 0.484 | ==    | ==    |          | 275 | LEU    | CD1 | 25.202 | 0.933  | ==    | ==    | ==       |
| 97  | VAL    | CG1 | 22.085 | 0.578 | ==    |       | ==       | 275 | LEU    | CD2 | 22.493 | 0.947  | ==    | ==    | ==       |
| 97  | VAL    | CG2 | 19.363 | 1.347 | ==    |       | ==       | 280 | LEU    | CD1 | 25.779 | 0.672  | ==    | ==    | ==       |
| 103 | LEU    | CD1 | 24.748 | 0.490 | ==    | ==    |          | 280 | LEU    | CD2 | 23.405 | 0.710  | ==    | ==    |          |
| 103 | LEU    | CD2 | 24.100 | 0.972 | ==    | ==    |          | 284 | LEU    | CD1 | 23.945 | 0.843  | ==    |       |          |
| 104 | ILE    | CD1 | 14.779 | 0.845 | ==    | ==    |          | 284 | LEU    | CD2 | 27.398 | 1.039  | ==    |       |          |
| 108 | ILE    | CD1 | 9.981  | 0.637 | ==    | ==    | ==       | 285 | LEU    | CD1 | 25.695 | 1.052  | ==    | ==    |          |
| 110 | VAL    | CG1 | 20.954 | 0.767 | ==    |       |          | 285 | LEU    | CD2 | 24.003 | 1.119  | ==    | ==    |          |
| 110 | VAL    | CG2 | 20.424 | 0.476 | ==    |       |          | 290 | LEU    | CD1 | 27.886 | 1.074  | ==    | ==    |          |
| 115 | LEU    | CD1 | 22.828 | 0.684 | (==)  |       |          | 290 | LEU    | CD2 | 21.864 | 0.792  | ==    | ==    |          |
| 115 | LEU    | CD2 | 24.597 | 0.587 | (!)   |       |          | 293 | VAL    | CG1 | 21.422 | 1.004  | ==    |       |          |
| 116 | ILE    | CD1 | 13.706 | 0.459 | (!!)  |       |          | 293 | VAL    | CG2 | 22.246 | 0.901  | ==    |       |          |
| 121 | LEU    | CD1 | 24.729 | 0.665 | ==    |       |          | 302 | VAL    | CG1 | 22.153 | 1.059  | ==    |       |          |
| 121 | LEU    | CD2 | 22.791 | 0.779 | ==    |       |          | 302 | VAL    | CG2 | 19.070 | 1.262  | ==    |       |          |
| 122 | LEU    | CD1 | 25.548 | 0.930 | (!!)  |       |          | 304 | LEU    | CD1 | 24.263 | 0.848  | (==)  | ==    |          |
| 122 | LEU    | CD2 | 26.848 | 0.937 | (!!)  |       |          | 304 | LEU    | CD2 | 26.586 | 0.702  | (==)  | ==    |          |
| 132 | ILE    | CD1 | 12.360 | 0.560 | ==    |       |          | 311 | LEU    | CD1 | 26.326 | 0.870  | ==    |       | ==       |
| 135 | LEU    | CD1 | 24.040 | 0.888 | (!!)  |       |          | 311 | LEU    | CD2 | 22.652 | 0.797  | ==    |       | ==       |
| 135 | LEU    | CD2 | 24.317 | 0.882 | (!=)  |       |          | 317 | ILE    | CD1 | 12.483 | 1.118  | (==)  | ==    | ==       |
| 139 | LEU    | CD1 | 25.914 | 0.787 | !=    |       |          | 329 | ILE    | CD1 | 12.362 | 0.821  | ==    | ==    | ==       |
| 139 | LEU    | CD2 | 22.927 | 0.852 | !!    |       |          | 333 | ILE    | CD1 | 12.253 | -0.138 | (==)  | ==    | ==       |
| 147 | LEU    | CD1 | 22.500 | 0.683 | (==)  |       |          | 343 | VAL    | CG1 | 21.297 | 0.863  | ==    | ==    | ==       |



|     |     |     |        |        |      |    |    |     |     |     |        |       |      |    |    |  |
|-----|-----|-----|--------|--------|------|----|----|-----|-----|-----|--------|-------|------|----|----|--|
| 200 | ILE | CD1 | 16.119 | 0.746  | ==   | == | == | 577 | LEU | CD1 | 26.739 | 0.781 | (!!) |    |    |  |
| 202 | LEU | CD1 | 24.801 | 0.768  | ==   | == |    | 577 | LEU | CD2 | 22.528 | 0.738 | (!)  |    |    |  |
| 202 | LEU | CD2 | 22.680 | 0.501  | ==   | == |    | 579 | ILE | CD1 | 14.656 | 0.757 | ==   | == | == |  |
| 210 | LEU | CD1 | 28.067 | 1.090  | ==   |    | == | 581 | VAL | CG1 | 20.609 | 0.530 | ==   |    |    |  |
| 210 | LEU | CD2 | 22.536 | 0.904  | ==   |    | == | 581 | VAL | CG2 | 20.334 | 0.527 | ==   |    |    |  |
| 217 | VAL | CG1 | 21.989 | 0.800  | ==   |    |    | 592 | ILE | CD1 | 13.646 | 0.825 | ==   |    | == |  |
| 217 | VAL | CG2 | 21.929 | 0.880  | ==   |    |    | 596 | LEU | CD1 | 26.922 | 1.050 | ==   |    | == |  |
| 229 | ILE | CD1 | 10.616 | 0.562  | ==   | == | == | 596 | LEU | CD2 | 24.904 | 1.053 | ==   |    |    |  |
| 230 | LEU | CD1 | 21.754 | 0.680  | ==   |    |    | 600 | VAL | CG1 | 22.462 | 0.752 | ==   |    | == |  |
| 230 | LEU | CD2 | 24.072 | -0.499 | (==) |    |    | 600 | VAL | CG2 | 25.068 | 0.974 | ==   |    |    |  |
| 231 | LEU | CD1 | 25.413 | 0.876  | ==   |    |    | 603 | ILE | CD1 | 14.352 | 0.502 | (==) |    | == |  |
| 231 | LEU | CD2 | 24.834 | 1.069  | ==   |    |    | 604 | LEU | CD1 | 27.761 | 0.912 | ==   | == |    |  |
| 236 | LEU | CD1 | 25.156 | 0.804  | (==) | == |    | 604 | LEU | CD2 | 23.071 | 0.754 | ==   | == |    |  |
| 236 | LEU | CD2 | 22.500 | 0.699  | (==) | == |    | 607 | VAL | CG1 | 23.104 | 1.033 | ==   |    | == |  |
| 238 | ILE | CD1 | 13.747 | 0.503  | ==   | == | == | 607 | VAL | CG2 | 26.709 | 1.120 | ==   |    | == |  |
| 240 | LEU | CD1 | 24.913 | 0.632  | ==   | == | == | 608 | VAL | CG1 | 20.748 | 1.329 | (==) |    |    |  |
| 240 | LEU | CD2 | 24.407 | 0.715  | ==   | == |    | 608 | VAL | CG2 | 21.975 | 1.155 | (==) |    |    |  |
| 242 | ILE | CD1 | 12.365 | 0.664  | ==   |    | == | 611 | VAL | CG1 | 21.774 | 0.864 | ==   |    |    |  |
| 248 | ILE | CD1 | 12.276 | 0.756  | (!!) |    |    | 611 | VAL | CG2 | 25.146 | 1.349 | ==   |    | == |  |
| 256 | ILE | CD1 | 11.691 | 0.901  | ==   |    | == | 623 | ILE | CD1 | 14.613 | 0.784 | (==) |    |    |  |
| 259 | VAL | CG1 | 19.992 | 0.651  | ==   |    |    | 626 | VAL | CG1 | 20.784 | 0.805 | ==   |    |    |  |
| 259 | VAL | CG2 | 21.191 | 0.648  | ==   |    | == | 626 | VAL | CG2 | 21.600 | 0.882 | ==   |    |    |  |
| 260 | ILE | CD1 | 11.138 | 0.651  | (==) |    | !! | 628 | LEU | CD1 | 25.544 | 0.894 | ==   |    |    |  |
| 261 | VAL | CG1 | 22.279 | 0.898  | ==   |    |    | 628 | LEU | CD2 | 23.460 | 0.678 | ==   |    |    |  |
| 261 | VAL | CG2 | 21.020 | 0.924  | ==   |    |    | 635 | LEU | CD1 | 27.517 | 0.867 | ==   |    |    |  |
| 265 | ILE | CD1 | 9.490  | 0.378  | (==) | == |    | 635 | LEU | CD2 | 25.306 | 1.020 | ==   |    |    |  |
| 268 | ILE | CD1 | 13.602 | 0.655  | (==) |    | !! | 642 | ILE | CD1 | 15.941 | 0.647 | ==   |    | == |  |
| 269 | LEU | CD1 | 26.885 | 0.876  | ==   |    |    | 646 | LEU | CD1 | 23.659 | 0.863 | ==   |    |    |  |
| 269 | LEU | CD2 | 22.419 | 0.655  | ==   |    |    | 646 | LEU | CD2 | 25.235 | 0.829 | ==   |    |    |  |
| 275 | VAL | CG1 | 23.138 | 0.833  | (==) |    |    | 650 | ILE | CD1 | 8.057  | 0.581 | ==   |    | == |  |
| 275 | VAL | CG2 | 21.430 | 0.785  | (==) |    |    | 651 | LEU | CD1 | 28.466 | 1.193 | ==   |    | == |  |
| 278 | VAL | CG1 | 21.032 | 0.423  | (==) |    |    | 651 | LEU | CD2 | 25.318 | 1.057 | ==   |    | == |  |
| 278 | VAL | CG2 | 18.142 | 0.642  | (==) |    |    | 656 | VAL | CG1 | 22.427 | 0.763 | ==   |    | == |  |
| 284 | ILE | CD1 | 13.198 | 0.745  | (==) |    |    | 656 | VAL | CG2 | 24.262 | 1.119 | ==   |    | == |  |
| 286 | LEU | CD1 | 25.696 | 0.881  | (==) |    |    | 660 | LEU | CD1 | 25.900 | 0.717 | ==   | == |    |  |
| 286 | LEU | CD2 | 26.157 | 0.768  | (==) |    |    | 660 | LEU | CD2 | 23.362 | 0.479 | ==   | == |    |  |
| 291 | LEU | CD1 | 25.289 | 0.601  | ==   | == |    | 666 | VAL | CG1 | 19.705 | 0.899 | ==   |    |    |  |
| 291 | LEU | CD2 | 26.260 | 0.771  | ==   | == |    | 666 | VAL | CG2 | 21.958 | 1.127 | (==) |    |    |  |
| 293 | LEU | CD1 | 25.478 | 0.930  | (=!) |    |    | 667 | VAL | CG1 | 22.628 | 1.058 | ==   |    |    |  |
| 293 | LEU | CD2 | 24.044 | 0.778  | (!=) |    |    | 667 | VAL | CG2 | 23.404 | 1.131 | ==   |    |    |  |
| 298 | LEU | CD1 | 23.575 | 1.052  | (=!) |    |    | 696 | LEU | CD1 | 26.693 | 0.738 | ==   |    |    |  |
| 298 | LEU | CD2 | 25.239 | 0.821  | (==) |    |    | 696 | LEU | CD2 | 24.144 | 0.903 | ==   |    |    |  |
| 313 | LEU | CD1 | 25.130 | 0.938  | (=!) |    |    | 697 | ILE | CD1 | 14.757 | 0.574 | (==) |    | == |  |
| 313 | LEU | CD2 | 24.015 | 0.807  | (==) |    |    | 699 | LEU | CD1 | 25.034 | 0.907 | ==   |    |    |  |
| 327 | ILE | CD1 | 13.073 | 0.572  | ==   |    |    | 699 | LEU | CD2 | 22.156 | 0.881 | ==   |    |    |  |
| 329 | LEU | CD1 | 25.272 | 0.204  | (==) |    |    | 711 | LEU | CD1 | 25.811 | 0.806 | ==   |    |    |  |
| 329 | LEU | CD2 | 22.249 | 0.625  | ==   |    |    | 711 | LEU | CD2 | 22.836 | 1.022 | ==   |    |    |  |
| 334 | LEU | CD2 | 27.669 | 0.780  | (==) | == |    | 712 | LEU | CD1 | 24.727 | 0.182 | ==   |    |    |  |
| 335 | LEU | CD1 | 25.213 | 0.818  | (==) |    |    | 712 | LEU | CD2 | 22.944 | 0.057 | ==   |    | !! |  |
| 335 | LEU | CD2 | 22.086 | 0.633  | (!!) |    |    | 717 | LEU | CD1 | 25.176 | 0.980 | (==) |    |    |  |
| 337 | ILE | CD1 | 14.606 | 0.875  | ==   | == |    | 717 | LEU | CD2 | 23.695 | 0.956 | (==) |    |    |  |
| 343 | LEU | CD1 | 22.988 | 0.988  | ==   |    |    |     |     |     |        |       |      |    |    |  |
| 343 | LEU | CD2 | 25.785 | 0.745  | ==   |    |    |     |     |     |        |       |      |    |    |  |

a7a7

|    | Methyl | 13C | 1H     | FLYA  | MAGMA | MAPXS | FLAMENGO |    | Methyl | 13C | 1H  | FLYA   | MAGMA  | MAPXS | FLAMENGO |    |
|----|--------|-----|--------|-------|-------|-------|----------|----|--------|-----|-----|--------|--------|-------|----------|----|
| 21 | LEU    | CD1 | 25.996 | 0.607 | (=!)  | ==    | ==       | == | 113    | VAL | CG1 | 20.996 | 0.301  | ==    | ==       | == |
| 24 | VAL    | CG1 | 24.215 | 0.930 | ==    |       | ==       | == | 113    | VAL | CG2 | 21.787 | -0.033 | ==    | ==       | == |
| 24 | VAL    | CG2 | 21.800 | 0.873 | ==    |       | ==       | == | 116    | VAL | CG1 | 22.011 | 0.950  | ==    |          | !! |
| 31 | VAL    | CG1 | 21.101 | 0.975 | ==    |       | ==       | == | 116    | VAL | CG2 | 21.613 | 0.940  | ==    |          | !! |
| 38 | LEU    | CD1 | 26.082 | 0.639 | ==    | ==    | ==       | == | 134    | VAL | CG1 | 22.670 | 0.742  | ==    |          | == |
| 38 | LEU    | CD2 | 28.507 | 0.701 | ==    | ==    | ==       | == | 134    | VAL | CG2 | 23.838 | 0.872  | ==    |          | == |
| 46 | VAL    | CG1 | 19.945 | 0.821 | ==    |       | ==       | == | 136    | LEU | CD1 | 27.678 | 0.667  | ==    | ==       | !! |
| 46 | VAL    | CG2 | 22.010 | 0.938 | ==    |       | ==       | == | 136    | LEU | CD2 | 26.611 | 0.410  | ==    | ==       | !! |
| 47 | LEU    | CD1 | 25.259 | 0.714 | ==    | ==    | ==       | == | 137    | ILE | CD1 | 14.071 | 0.374  | ==    | ==       | == |
| 47 | LEU    | CD2 | 28.341 | 0.572 | ==    | ==    | ==       | !! | 141    | ILE | CD1 | 12.458 | 0.616  | ==    | ==       | == |
| 48 | LEU    | CD1 | 26.717 | 0.608 | ==    | ==    | ==       | == | 144    | ILE | CD1 | 11.757 | 0.762  | ==    | ==       | == |
| 48 | LEU    | CD2 | 23.970 | 0.748 | ==    | ==    | ==       | !! | 148    | LEU | CD1 | 25.245 | 0.731  | ==    | ==       | == |
| 49 | ILE    | CD1 | 14.168 | 0.594 | ==    | ==    | ==       | == | 148    | LEU | CD2 | 26.003 | 0.454  | ==    | ==       | == |
| 54 | VAL    | CG1 | 20.875 | 0.923 | ==    |       | ==       | == | 157    | ILE | CD1 | 13.663 | 0.638  | (==)  | ==       | == |
| 54 | VAL    | CG2 | 21.440 | 0.918 | ==    |       | ==       | == | 165    | ILE | CD1 | 13.629 | 0.425  | ==    | ==       | == |
| 58 | LEU    | CD1 | 21.343 | 0.440 | (!!)  | ==    |          | == | 172    | VAL | CG1 | 23.655 | 0.696  | ==    |          | == |
| 58 | LEU    | CD2 | 26.121 | 0.784 | (=!)  | ==    |          | == | 172    | VAL | CG2 | 22.860 | 0.799  | ==    |          | == |
| 59 | ILE    | CD1 | 13.464 | 0.791 | (==)  | ==    |          | == | 173    | VAL | CG1 | 21.461 | 0.946  | ==    |          | == |
| 64 | ILE    | CD1 | 12.983 | 0.799 | ==    | ==    | ==       | == | 173    | VAL | CG2 | 23.532 | 0.982  | ==    |          | == |
| 67 | ILE    | CD1 | 13.905 | 0.542 | ==    | ==    | ==       | == | 176    | LEU | CD1 | 25.759 | 0.638  | (==)  | ==       | == |
| 69 | LEU    | CD1 | 24.774 | 0.755 | ==    | ==    | ==       | == | 176    | LEU | CD2 | 22.386 | 0.901  | (==)  | ==       | == |
| 69 | LEU    | CD2 | 22.438 | 0.425 | ==    | ==    | ==       | == | 184    | LEU | CD1 | 25.965 | 0.733  | ==    | ==       | == |



|     |     |     |        |        |      |    |    |    |     |     |     |        |        |    |    |    |    |
|-----|-----|-----|--------|--------|------|----|----|----|-----|-----|-----|--------|--------|----|----|----|----|
| 70  | ILE | CD1 | 11.698 | 0.660  | ==   | == | == | == | 184 | LEU | CD2 | 22.537 | 0.806  | == | == | == | == |
| 74  | VAL | CG1 | 20.747 | 0.770  | ==   |    | == | !! | 190 | VAL | CG1 | 21.380 | -0.176 | == |    | == | == |
| 74  | VAL | CG2 | 22.071 | 0.947  | ==   |    | == | !! | 190 | VAL | CG2 | 23.016 | 0.630  | == |    | == | == |
| 77  | VAL | CG1 | 22.491 | 0.733  | ==   |    | == | == | 192 | LEU | CD1 | 24.522 | 1.077  | == | == | == | == |
| 77  | VAL | CG2 | 21.784 | 0.755  | ==   |    | == | == | 192 | LEU | CD2 | 26.319 | 0.975  | == | == | == | == |
| 81  | LEU | CD1 | 22.548 | 1.077  | ==   | == | == | == | 194 | ILE | CD1 | 10.361 | 0.506  | == | == | == | == |
| 81  | LEU | CD2 | 26.063 | 1.194  | ==   | == | == | == | 197 | LEU | CD1 | 23.729 | 0.645  | == | == | == | == |
| 82  | VAL | CG1 | 21.933 | 1.173  | ==   |    | == | == | 197 | LEU | CD2 | 25.212 | 0.652  | == | == | == | == |
| 82  | VAL | CG2 | 21.877 | 1.099  | ==   |    | == | == | 201 | LEU | CD1 | 25.766 | 0.784  | == | == | == | == |
| 87  | VAL | CG1 | 20.901 | 1.033  | (==) |    |    | !! | 201 | LEU | CD2 | 22.016 | 0.660  | == | == | == | == |
| 87  | VAL | CG2 | 20.479 | 1.151  | (==) |    | !! | !! | 207 | LEU | CD1 | 24.814 | 0.835  | == | == | == | == |
| 88  | LEU | CD1 | 25.077 | 0.242  | ==   | == | == | !! | 207 | LEU | CD2 | 26.319 | 0.762  | == | == | == | == |
| 88  | LEU | CD2 | 20.700 | -0.095 | ==   | == | == | !! | 212 | ILE | CD1 | 14.420 | 0.403  | == | == | == | == |
| 89  | VAL | CG1 | 21.464 | 0.784  | ==   |    |    | !! | 215 | ILE | CD1 | 16.367 | 1.051  | == | == | == | == |
| 89  | VAL | CG2 | 23.461 | 0.711  | ==   |    | == | !! | 217 | VAL | CG1 | 20.710 | 0.916  | == |    |    | !! |
| 94  | ILE | CD1 | 13.229 | 0.793  | (==) | == | == | == | 217 | VAL | CG2 | 21.220 | 0.945  | == |    | == | !! |
| 106 | LEU | CD1 | 24.657 | 0.440  | ==   | == | == | == | 223 | ILE | CD1 | 11.794 | 0.782  | == | == | == | == |
| 106 | LEU | CD2 | 23.969 | 0.227  | ==   | == | == | == | 229 | VAL | CG1 | 21.420 | 1.023  | == |    | == | == |
| 107 | VAL | CG1 | 22.135 | 0.828  | ==   |    | == | !! | 229 | VAL | CG2 | 23.133 | 1.180  | == |    | == | == |
| 107 | VAL | CG2 | 21.775 | 0.745  | ==   |    |    | !! | 233 | LEU | CD1 | 25.610 | 0.872  | == | == | == | == |
| 109 | ILE | CD1 | 13.179 | 0.726  | ==   | == | == | == | 233 | LEU | CD2 | 22.819 | 0.696  | == | == | == | == |
| 112 | LEU | CD1 | 23.297 | 0.652  | ==   | == | == | == |     |     |     |        |        |    |    |    |    |
| 112 | LEU | CD2 | 26.192 | 0.634  | ==   | == | == | == |     |     |     |        |        |    |    |    |    |

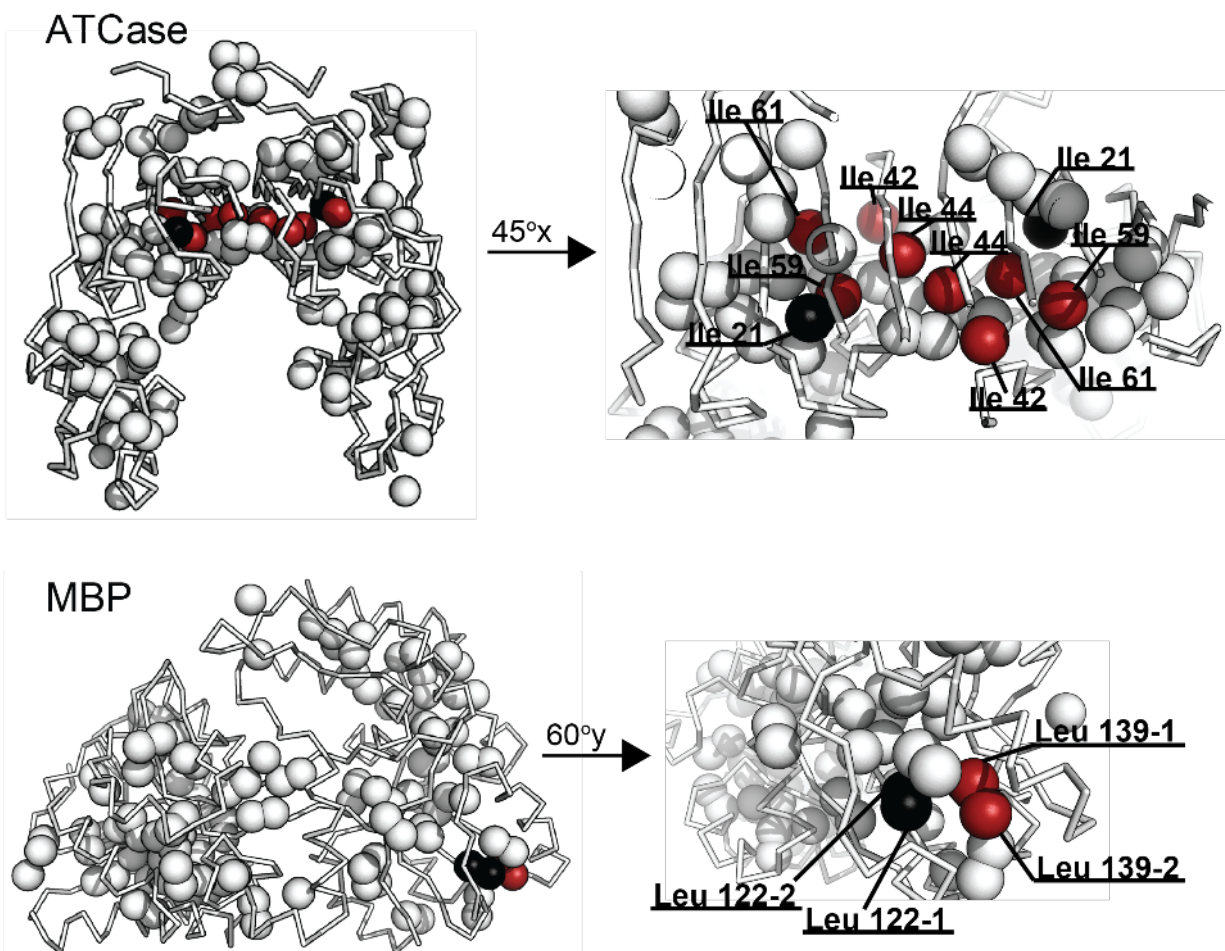

**Figure S4.** Sources of errors in the automatic methyl resonance assignments generated by MethylFLYA. Carbon atoms of the erroneously assigned methyls are shown as red spheres, whereas their correct assignment positions are given in black spheres, or exceptionally in red when the assignment at those positions is also incorrect (i.e. for assignment swaps such as Ile42 $\leftrightarrow$ Ile44). The mis-assigned resonances belong to nearby methyl groups. For ATCase, the assignment errors cluster at the interface of the two subunits of the homodimer.

**Table S2.** Summary of errors in the automatic methyl resonance assignments generated by MethylFLYA. The mis-assigned methyls are assigned to spatially proximal residues.

| Protein | Methyl group       | Erroneously assigned to | C–C distance (Å)<br>between correct and<br>erroneous assignment |
|---------|--------------------|-------------------------|-----------------------------------------------------------------|
| ATCase  | Ile 42 $\delta_1$  | Ile 44 $\delta_1$       | 5.5                                                             |
|         | Ile 44 $\delta_1$  | Ile 42 $\delta_1$       | 5.5                                                             |
|         | Ile 59 $\delta_1$  | Ile 21 $\delta_1$       | 4.0                                                             |
|         | Ile 61 $\delta_1$  | Ile 59 $\delta_1$       | 5.9                                                             |
| MBP     | Leu 139 $\delta_1$ | Leu 122 $\delta_1$      | 5.2                                                             |
|         | Leu 139 $\delta_2$ | Leu 122 $\delta_2$      | 6.9                                                             |

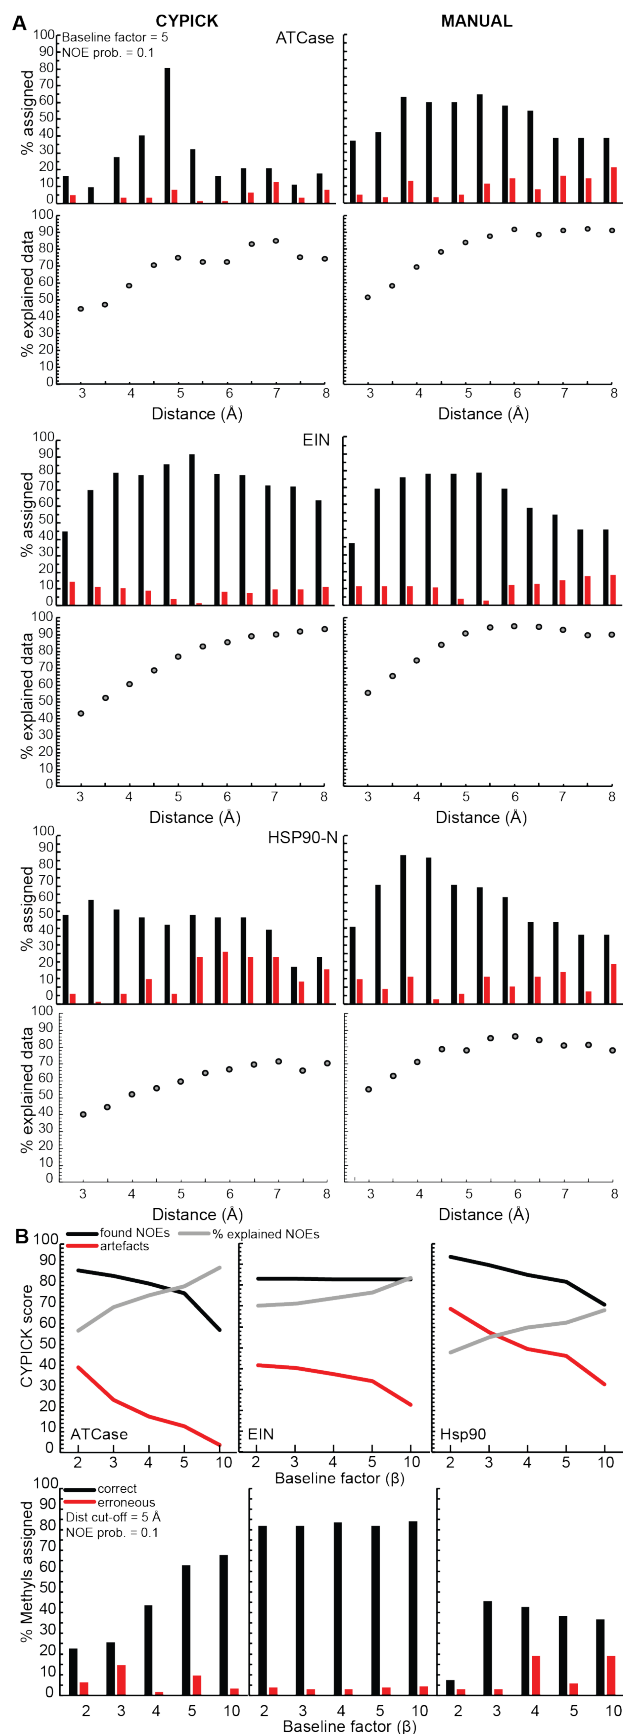

**Figure S5.** Parameter optimization for automatic NOESY peak picking with CYPICK. **(A)** Percentage of accurately (black) and erroneously (red) assigned methyls as a function of methyl  $^1\text{H}$ - $^1\text{H}$  NOE distance cutoffs,  $d_{\text{cut}}$ , at fixed NOE probability value  $p_{\text{NOE}} = 0.1$ . Results using the automatically generated CYPICK NOESY lists are in the left columns, and results obtained using the manually prepared NOESY lists are in the right column. **(B)** Varying baseline factors for automatic peak picking of methyl-methyl NOESY spectra using CYPICK at fixed distance cutoff  $d_{\text{cut}} = 5 \text{ \AA}$  and NOE probability value  $p_{\text{NOE}} = 0.1$ . Variation of the CYPICK find score (*black*), artifact score (red), and the percentage of explained inter-methyl NOEs (*grey*) as a function of the baseline factor. For all three proteins, a fixed distance cutoff  $d_{\text{cut}} = 5 \text{ \AA}$  and an NOE observation probability  $p_{\text{NOE}} = 0.1$  were used to generate the expected methyl-methyl NOEs. Assignment percentages are relative to the number of reference assignments.

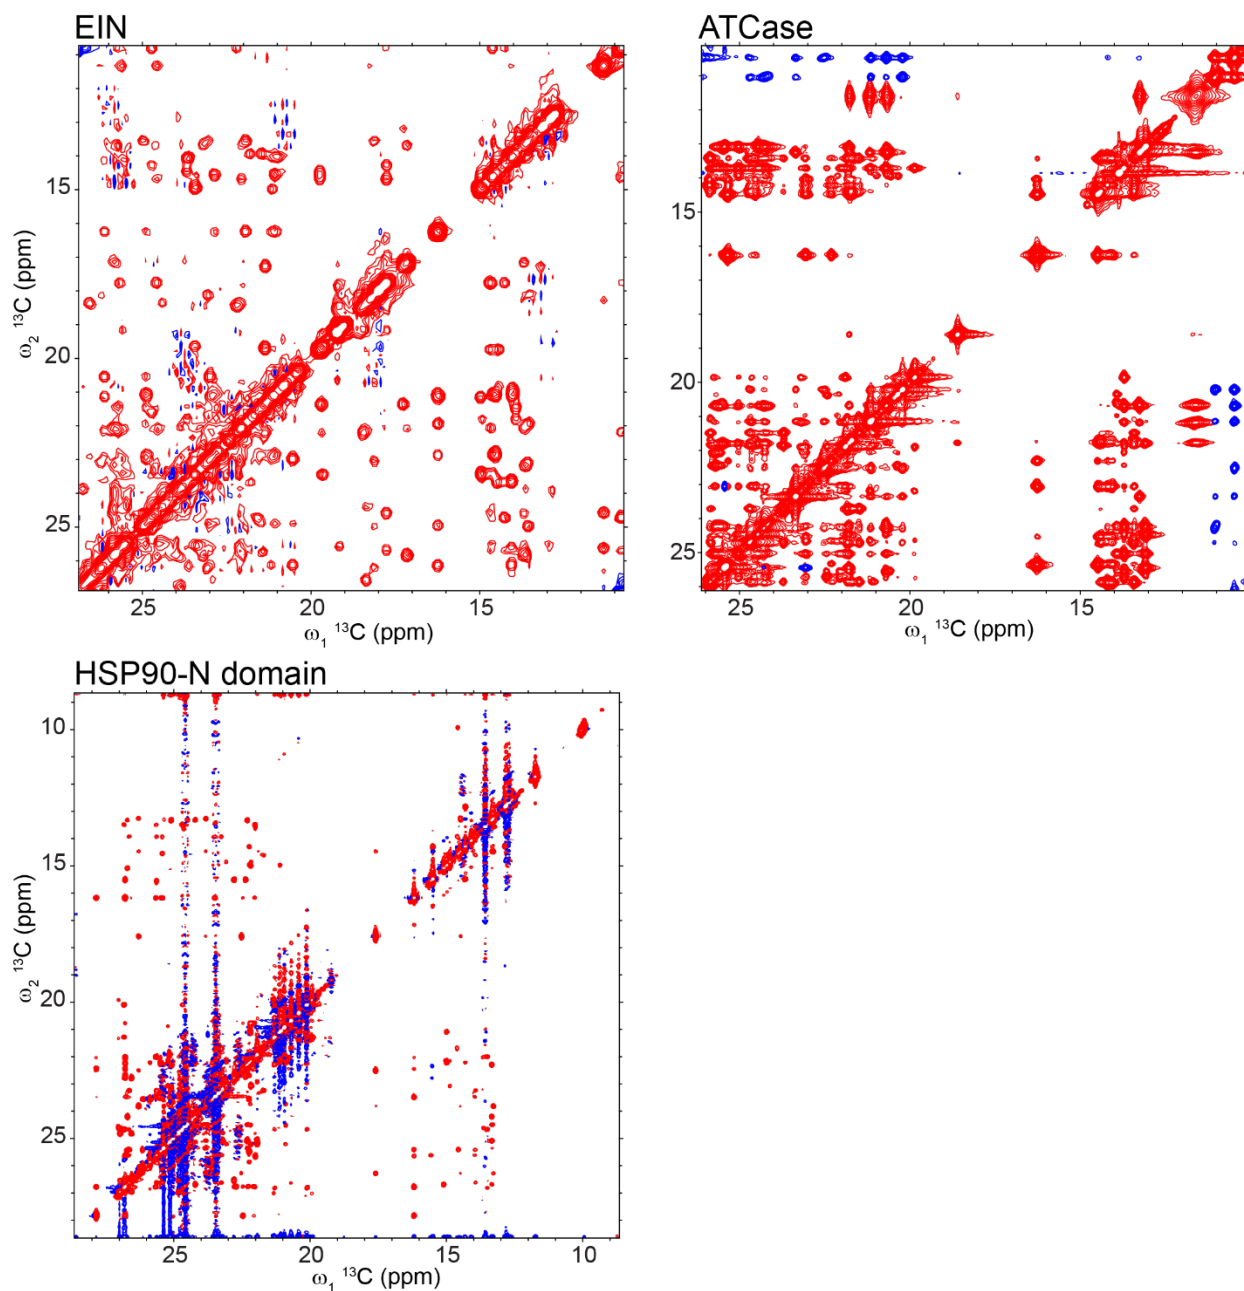

**Figure S6.** 2D  $^{13}\text{C}(\omega_1)$ - $^{13}\text{C}(\omega_2)$  projections of 3D CCH NOESY (ATCase, HSP90) or 4D HCCH NOESY spectra (EIN). All spectra are plotted with contour levels starting at a signal-to-noise ratio of three, as determined by the software Sparky (T. D. Goddard and D. G. Kneller, University of California, San Francisco). Positive and negative contours are colored in red and blue, respectively. The spectra were acquired previously by Venditti *et al.*<sup>27</sup> (EIN), Velyvis *et al.*<sup>24</sup> (ATCase), and Shah *et al.*<sup>41</sup> (HSP90).

**Table S3.** MethylFLYA computation times (h) for different combinations of input NMR data, as in Figure 3.

| Protein            | Filtered NOEs | Unfiltered NOEs | L, V=LV | 2L, 2V | L, V=LV, 2LV |
|--------------------|---------------|-----------------|---------|--------|--------------|
| EIN                | 0.52          | 0.50            | 0.54    | 0.48   | 0.54         |
| ATCase             | 0.38          | 0.40            | 0.40    | 0.36   | 0.41         |
| MBP                | 0.46          | 0.45            | 0.53    | 0.52   | 0.59         |
| MSG                | 1.23          | 1.23            | 1.53    | 1.20   | 1.24         |
| $\alpha_7\alpha_7$ | 0.50          | 0.51            | 0.60    | 0.69   | 0.79         |

Calculations were performed using 100 Intel Xeon E5-2690 processor cores in parallel.

**Table S4.** Results of the CYPICK application to the 3D CCH NOESY (ATCase, HSP90) and 4D HCCH NOESY (EIN) spectra. The results are given for the baseline factor  $\beta = 5$ . A find score indicates which percentage of NOE peaks from the reference were also found by CYPICK. Overall, find, and artifact scores are defined by Würz *et al.*<sup>37</sup>

| Protein | Peaks (reference) | Peaks (CYPICK) | Overall score (%) | Find score (%) | Artifact score (%) |
|---------|-------------------|----------------|-------------------|----------------|--------------------|
| EIN     | 618               | 775            | 74                | 83             | 34                 |
| ATCase  | 563               | 495            | 74                | 77             | 13                 |
| HSP90   | 409               | 624            | 68                | 82             | 46                 |

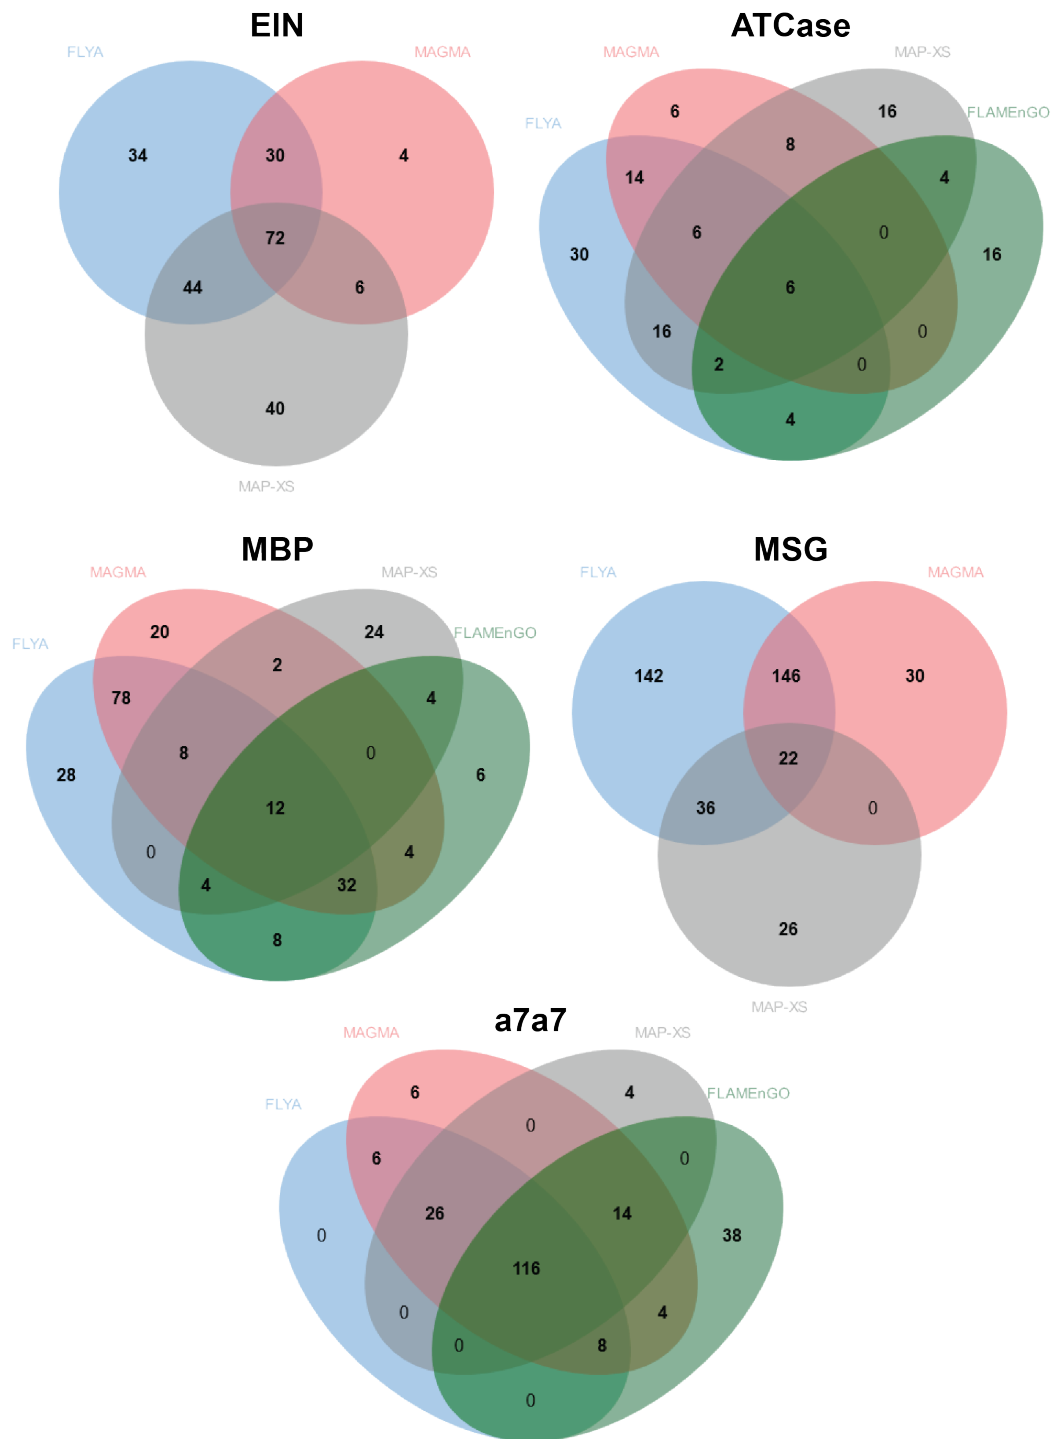

**Figure S7.** Intersection of assignments generated with different automatic methyl assignment protocols. The illustration of the intersections of assignment solutions from MethylFLYA, MAGMA, FLAMEnGO2.0, and MAP-XSII are shown for the indicated benchmark cases. In the case of FLAMEnGO2.0, no confident (100%) assignments were found for EIN and MSG.

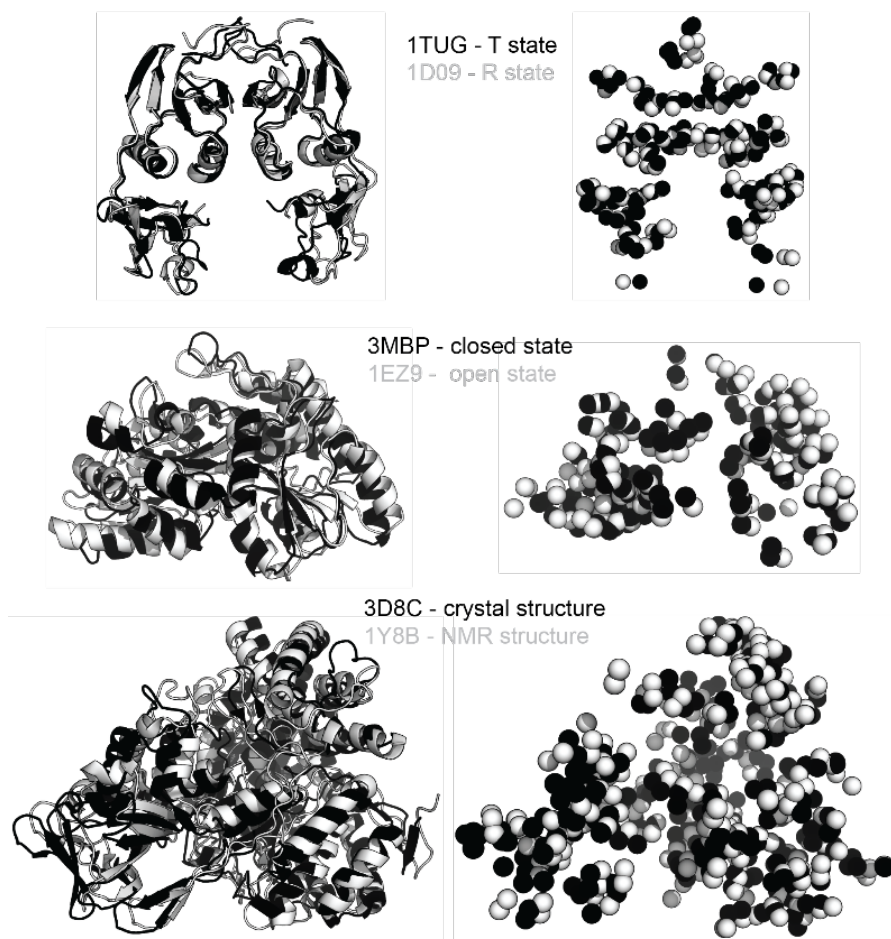

| Protein | PDB ID        | correct | error |
|---------|---------------|---------|-------|
| atcase  | 1d09 (Rstate) | 36      | 3     |
|         | 1tug (Tstate) | 36      | 1     |
| mbp     | 1ez9 (open)   | 83      | 2     |
|         | 3mbp (closed) | 75      | 2     |
| msg     | 1y8b (NMR)    | 129     | 0     |
|         | 1d8c (X-ray)  | 173     | 0     |

**Figure S8.** MethylFLYA performance on different input structures for three enzymes in the benchmark. Differences in backbone conformations between the different protein states are shown with protein structures in cartoon representation (*right* column). In the *left* column, the positions of the methyl carbons are indicated with spheres for each of the conformers, with colors matching those assigned to the backbone (*right*). The total number of accurate and erroneous “strong” methyl assignments generated with MethylFLYA using different conformers is summarized in the table (bottom row).

## Supplementary methods

An example MethylFLYA automated methyl assignment calculation for the N-terminal domain of *E. coli* Enzyme I (EIN) can be downloaded from <http://www.cyana.org/methylflya.tgz>.

The complete assignment calculation is performed by first running the *RUN.cya* macro that calls *PREP.cya* to make expected peaks using three different NOE distance cutoffs, and starts parallel FLYA automated assignment runs with *CALC.cya* for the different NOE distance cutoffs. After completing the FLYA runs, consensus chemical shifts are obtained with *CONSOL.cya*, which must be run separately.

Input files:

|                      |                                                                                                                                                                                         |
|----------------------|-----------------------------------------------------------------------------------------------------------------------------------------------------------------------------------------|
| <i>demo.seq</i>      | amino acid sequence                                                                                                                                                                     |
| <i>demo.pdb</i>      | 3D structure                                                                                                                                                                            |
| <i>C13HSQC.peaks</i> | 2D [ <sup>1</sup> H, <sup>13</sup> C]-HMQC peak list with amino acid type assignments (peaks are assigned to methyl groups of the correct amino acid type but arbitrary residue number) |
| <i>HCcCH.peaks</i>   | short mixing-time 4D CCNOESY for intraresidual Leu/Val connections                                                                                                                      |
| <i>CCNOESY.peaks</i> | 4D CCNOESY peak list, unassigned                                                                                                                                                        |
| <i>ref.prot</i>      | reference chemical shifts (for comparison only)                                                                                                                                         |
| <i>init.cya</i>      | initialization macro                                                                                                                                                                    |
| <i>RUN.cya</i>       | automated assignment calculation (calls <i>PREP.cya</i> , <i>CALC.cya</i> )                                                                                                             |
| <i>PREP.cya</i>      | prepare peak lists for FLYA                                                                                                                                                             |
| <i>CALC.cya</i>      | run FLYA assignment calculation                                                                                                                                                         |
| <i>CONSOL.cya</i>    | determine consensus chemical shifts                                                                                                                                                     |

The preparation macro, *PREP.cya*, performs the following tasks:

1. The [<sup>1</sup>H,<sup>13</sup>C]-HMQC peak list, *C13HSQC.peaks*, which is assigned to methyls of the correct amino acid type (and arbitrary residue numbers that are not used), is split into four amino acid type-specific peak lists, *C13HSQC\_X.peaks*, with  $X = A, I, L, V$ .
2. The peaks in the unassigned short mixing-time 4D CCNOESY peak list, *HCcCH.peaks* (formally treated as an HCCH TOCSY-type experiment), which contains intraresidual connections between the two methyl groups of Leu or Val, are assigned to amino acid types (and irrelevant, arbitrary residue numbers) according to the closest [<sup>1</sup>H,<sup>13</sup>C]-HMQC peaks, and the peak list is split into two amino acid type-specific peak lists, *HCcCH\_L.peaks* and *HCcCH\_V.peaks*.
3. The unassigned 4D NOESY peak list, *CCNOESY.peaks*, is treated similarly, and split into 16 amino acid pair type-specific peak lists, *CCNOESY\_XY.peaks*, with  $X, Y = A, I, L, V$ .
4. The macro *peaklists.cya* that specifies the generation of expected peaks during the FLYA calculations in *CALC.cya* is written.

The *RUN.cya* macro creates three subdirectories *demo\_d4.5*, *demo\_d5.0*, and *demo\_d5.5* for the three FLYA calculations with different NOE distance cutoffs,  $d_{\text{cut}} = 4.5, 5.0, 5.5 \text{ \AA}$ . In each of these three directories, the input files are copied, the *PREP.cya* macro is executed, and three jobs of 100 individual FLYA assignment runs each are started with *CALC.cya*. The individual assignment runs are executed in parallel on different processors, if available.



Subsequently, consensus assignments are generated with the *CONSOL.cya* macro that produces the following main output files:

|                           |                                                                |
|---------------------------|----------------------------------------------------------------|
| <i>consol.prot</i>        | consensus chemical shift lists (in XEASY format)               |
| <i>consol-strong.prot</i> | strong (confident) consensus chemical shifts (in XEASY format) |
| <i>consol.tab</i>         | table of consensus methyl assignments                          |
| <i>consol.pdf</i>         | plot of consensus methyl assignments                           |

Optionally (not used in this paper), already known, partial methyl assignments can be included in the calculation by specifying their shifts in a chemical shift list file, e.g. *fix.prot*, and adding the line 'shiftassign\_fix := fix.prot' to the *CALC.cya* macro.

For more details on specifying the partial assignments, comparing results to the known reference, or other generic FLYA input file requirements, macros, and output files please see: <http://www.cyana.org/wiki/index.php/Tutorials>.

## Experiment definitions in the CYANA library

The CYANA library (*cyana.lib*) contains definitions of the experiments necessary for automatic methyl resonance assignment with MethylFLYA:

```
SPECTRUM C13HSQC C H
0.980 C:C_A* H:H_A*

SPECTRUM CCNOESY3D C1 C2 H1
0.900 C1:C_A* H1:H_A* ~4.0 H_A* C2:C_A*
0.800 C1:C_A* H1:H_A* ~4.5 H_A* C2:C_A*
0.700 C1:C_A* H1:H_A* ~5.0 H_A* C2:C_A*
0.600 C1:C_A* H1:H_A* ~5.5 H_A* C2:C_A*
0.500 C1:C_A* H1:H_A* ~6.0 H_A* C2:C_A*

SPECTRUM CCNOESY H1 H2 C2 C1
0.900 C1:C_A* H1:H_A* ~4.0 H2:H_A* C2:C_A*
0.800 C1:C_A* H1:H_A* ~4.5 H2:H_A* C2:C_A*
0.700 C1:C_A* H1:H_A* ~5.0 H2:H_A* C2:C_A*
0.600 C1:C_A* H1:H_A* ~5.5 H2:H_A* C2:C_A*
0.500 C1:C_A* H1:H_A* ~6.0 H2:H_A* C2:C_A*

SPECTRUM HCcCH H1 H2 C2 C1
1.000 H1:H_ALI C1:C_ALI C_ALI C2:C_ALI H2:H_ALI
```

The header line of an experiment definition starts with the word SPECTRUM and gives the name of the spectrum type and a list of labels that correspond to the nuclei that constitute the direct and indirect dimensions, one for each spectral dimension.

Subsequent rows specify the magnetization transfer pathways for the experiment. The first number denotes the peak observation probability. It is followed by a linear list of atom types that defines a molecular fragment, in which atoms must be of the given types, e.g. H\_ALI for aliphatic hydrogens, H\_A\* for aliphatic or (for MethylFLYA irrelevant) aromatic hydrogens, C\_ALI for aliphatic carbons, etc., as defined in the ATOMTYPES section at the beginning of the CYANA residue library. Atoms must be connected to the next atom in the list either by a covalent bond or, in the instances where a tilde followed by a number is given, by an NOE, i.e. a distance shorter than the given cutoff (in Å) in the 3D structure. An expected peak is generated whenever a

molecular fragment matches the covalent structure and, in case of NOEs, the 3D protein structure. The nuclei for which the frequency is measured in the experiment are identified by labels, followed by a colon. There must be as many labels as in the header (SPECTRUM) line, corresponding to the dimensionality of the spectrum.

See [http://www.cyana.org/wiki/index.php/Residue\\_library\\_file](http://www.cyana.org/wiki/index.php/Residue_library_file) for more details about the CYANA library.

## Input peak list format

Input peak lists must contain a header line starting with #SPECTRUM that specifies the spectrum type and the labels, which must match the corresponding entry in the CYANA library, but may be permuted to indicate the order in which data for the spectral dimensions is given in peak list columns. For instance, a 4D NOESY peak list in XEASY format may start as follows:

```
# Number of dimensions 4
#SPECTRUM CCNOESY H1 C1 H2 C2
872 0.230 19.382 0.655 13.602 1 U 1.000E+02 0.000E+00 e 0 - - - -
874 -0.834 17.697 0.655 13.602 1 U 1.000E+02 0.000E+00 e 0 - - - -
883 0.848 21.207 0.390 11.341 1 U 1.000E+02 0.000E+00 e 0 - - - -
887 0.924 22.805 0.390 11.341 1 U 1.000E+02 0.000E+00 e 0 - - - -
894 1.376 25.567 0.390 11.341 1 U 1.000E+02 0.000E+00 e 0 - - - -
901 0.407 21.750 0.746 16.119 1 U 1.000E+02 0.000E+00 e 0 - - - -
```

Following the header, data for each peak is given on one line: peak number, peak position (ppm; 4 real numbers), “1 U”, peak volume, volume error (if known), “e 0”, and assignment (‘-’ if unassigned). Assignments, if present, are given in the form *A.r*, where *A* denotes an atom name and *r* a residue number.

## Table of consensus chemical shifts

The consolidation of the chemical shift assignments from individual assignment runs into consensus chemical shifts is documented in the MethylFLYA output file *consol.tab*, which contains the final methyl assignment results. The beginning of an example *consol.tab* file is given below.

| Atom | Residue | Ref | Shift  | Dev    | Extent | inside | inref |        |         |
|------|---------|-----|--------|--------|--------|--------|-------|--------|---------|
| QD1  | ILE     | 2   | 0.739  |        | 300.0  | 100.0  | 0.0   | strong |         |
| CD1  | ILE     | 2   | 16.246 |        | 300.0  | 99.9   | 0.0   | strong |         |
| QD1  | ILE     | 5   | 0.843  |        | 300.0  | 37.1   | 0.0   |        |         |
| CD1  | ILE     | 5   | 12.874 |        | 300.0  | 62.7   | 0.0   |        |         |
| QD1  | LEU     | 6   | 0.755  | 0.756  | -0.001 | 300.0  | 99.5  | 100.0  | strong= |
| QD2  | LEU     | 6   | 0.891  | 0.891  | 0.000  | 300.0  | 96.4  | 97.0   | strong= |
| CD1  | LEU     | 6   | 23.060 | 23.065 | -0.005 | 300.0  | 98.3  | 98.3   | strong= |
| CD2  | LEU     | 6   | 25.480 | 25.557 | -0.077 | 300.0  | 96.8  | 97.0   | strong= |

The first three columns in the file list the atom type, residue type, and residue number for each assigned atom. When a reference assignment is known, the value of the known reference chemical shift is listed in the fourth column. The consensus chemical shift (i.e. the MethylFLYA result) is given in the fifth (“Shift”) column. When applicable, its deviation from the reference assignment is given in the ‘Dev’ column in ppm. The ‘Extent’ column refers to the number of individual assignments runs, in which an assignment for the given atom was obtained. Given that a hundred

calculations are run at each of three distance cutoffs, the consolidation runs over 300 individual calculations. The next two columns 'inside' and 'inref' respectively specify the percentage of assignments for this atom in the (300) individual runs that agree (within the chemical shift tolerance specified in the init.cya file) with the consensus or reference assignment, respectively. The final column indicates whether an assignment is 'strong' (i.e. confident). For the calculations in this paper, assignments are classified as strong if and only if the percentage in the 'inside' column is 80% or more. When a reference assignment is known, a '=' is appended to the last column if the MethylFLYA assignment match the reference assignment (within the chemical shift tolerance), or '!' if the two assignments differ by more than the chemical shift tolerance.
